# Supplementary material
Source: PubMed Central journal article supplement (PMC3838201)
Supplement: NIHMS510441-supplement-S1-2.pdf [file NIHMS510441-supplement-S1-2.pdf]

## **SUPPLEMENTAL MATERIAL**

Figure S1

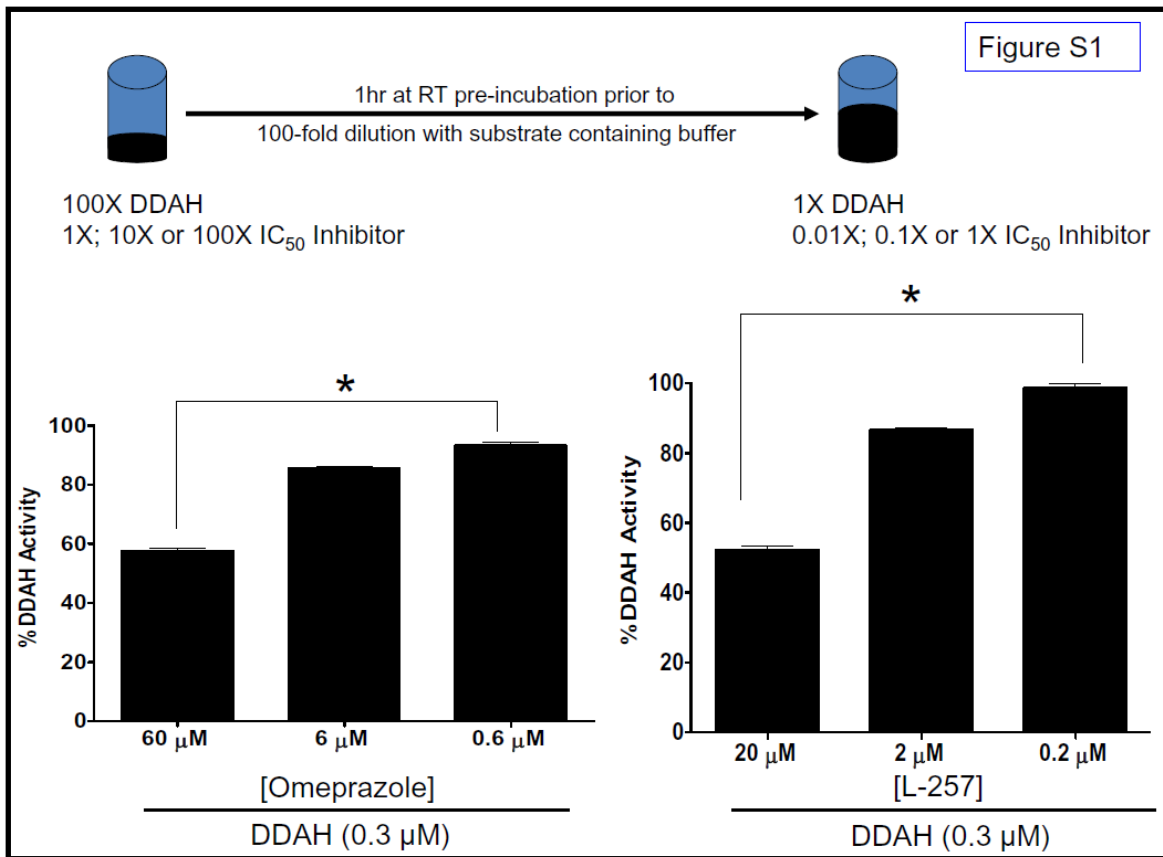

Figure S2

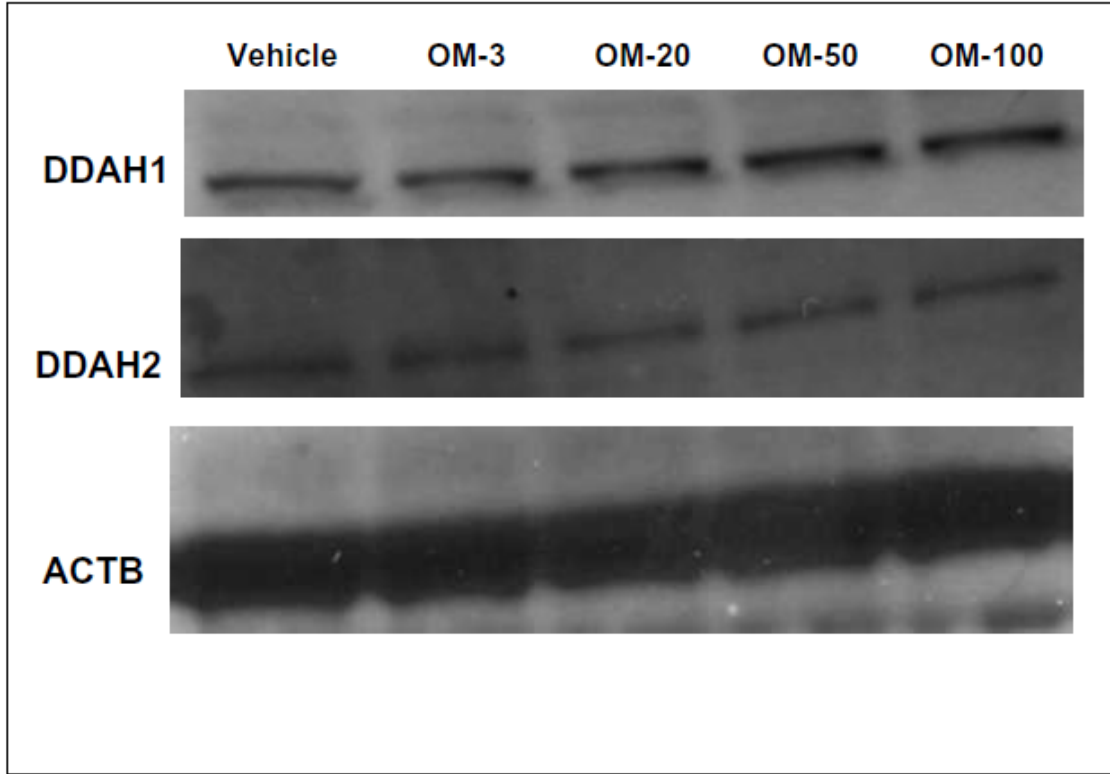

### **Supplemental Figure Legend:**

**Figure-S1:** Dilution assay demonstrating reversible inhibition of DDAH activity by the PPI omeprazole ( $IC_{50} \sim 60 \mu M$ ). The graph shows recovery of DDAH activity upon dilution of the inhibitor. Data are Mean  $\pm$  SEM of quadruplicates at each concentration (\* $p < 0.05$ ).

**Figure-S2:** PPIs do not regulate endothelial DDAH expression. The influence of PPIs on the expression of endothelial DDAH1 and DDAH2 proteins was studied by Western blot using lysate (20  $\mu g$  per lane) from endothelial cells exposed to the PPI omeprazole or vehicle. The expression was normalized to  $\beta$ -actin (ACTB).
